# Supplementary material for: Impact of repeated annual community directed treatment with ivermectin on loiasis parasitological indicators in Cameroon: Implications for onchocerciasis and lymphatic filariasis elimination in areas co-endemic with Loa loa in Africa
Source: PubMed Central journal article supplement (PMC6161907; doi:10.1371/journal.pntd.0006750), 2018-09-18
Supplement: pntd.0006750.s002.pdf [file pntd.0006750.s002.pdf]

| Region     |            |            | Microfilaria loads |              |                    |              | Total  |    |
|------------|------------|------------|--------------------|--------------|--------------------|--------------|--------|----|
|            |            |            | 0mf/ml             | 1-8000 mf/ml | 8001 – 30000 mf/ml | >30000 mf/ml |        |    |
| North-West | JATOR      | Positive   | 100                | 7            | 2                  | 2            | 111    |    |
|            |            | Percentage | 90,1%              | 6,3%         | 3,6%               | 1,8%         | 100,0% |    |
|            | MBIRIPKWA  | Positive   | 41                 | 25           | 2                  | 2            | 70     |    |
|            |            | Percentage | 58,6%              | 35,7%        | 5,7%               | 2,9%         | 100,0% |    |
|            | NGOMKOW    | Positive   | 59                 | 7            | 0                  | 0            | 66     |    |
|            |            | Percentage | 89,4%              | 10,6%        | 0,0%               | 0,0%         | 100,0% |    |
|            | NGU        | Positive   | 63                 | 36           | 8                  | 5            | 112    |    |
|            |            | Percentage | 56,2%              | 32,1%        | 11,6%              | 4,5%         | 100,0% |    |
|            | NGURI      | Positive   | 45                 | 29           | 7                  | 10           | 91     |    |
|            |            | Percentage | 49,5%              | 31,9%        | 18,7%              | 11,0%        | 100,0% |    |
|            | NKING      | Positive   | 45                 | 38           | 5                  | 8            | 96     |    |
|            |            | Percentage | 46,9%              | 39,6%        | 13,5%              | 8,3%         | 100,0% |    |
|            | NTEM       | Positive   | 64                 | 24           | 3                  | 4            | 95     |    |
|            |            | Percentage | 67,4%              | 25,3%        | 7,4%               | 4,2%         | 100,0% |    |
|            | NWANTI     | Positive   | 59                 | 38           | 9                  | 1            | 107    |    |
|            |            | Percentage | 55,1%              | 35,5%        | 9,3%               | 0,9%         | 100,0% |    |
|            | NWAT       | Positive   | 34                 | 13           | 5                  | 0            | 52     |    |
|            |            | Percentage | 65,4%              | 25,0%        | 9,6%               | 0,0%         | 100,0% |    |
|            | SABONGARI  | Positive   | 204                | 18           | 4                  | 2            | 228    |    |
|            |            | Percentage | 89,5%              | 7,9%         | 2,6%               | 0,9%         | 100,0% |    |
| Total      | Positive   | 714        | 235                | 79           | 34                 | 1028         |        |    |
|            | Percentage | 69,5%      | 22,9%              | 7,7%         | 3,3%               | 100          |        |    |
| South-West | Community  | AJAMAN     | Positive           | 83           | 5                  | 0            | 0      | 88 |
|            |            | Percentage | 94,3%              | 5,7%         | 0,0%               | 0,0%         | 100,0% |    |
|            | AKWA       | Positive   | 63                 | 2            | 1                  | 0            | 66     |    |

|           |            |       |       |      |      |        |
|-----------|------------|-------|-------|------|------|--------|
|           | Percentage | 95,5% | 3,0%  | 1,5% | 0,0% | 100,0% |
| ARARU     | Positive   | 26    | 4     | 0    | 0    | 30     |
|           | Percentage | 86,7% | 13,3% | 0,0% | 0,0% | 100,0% |
| ASSAM     | Positive   | 53    | 3     | 1    | 1    | 57     |
|           | Percentage | 93,0% | 5,3%  | 1,8% | 1,8% | 100,0% |
| BABI      | Positive   | 22    | 4     | 0    | 0    | 26     |
|           | Percentage | 84,6% | 15,4% | 0,0% | 0,0% | 100,0% |
| BABONG    | Positive   | 161   | 17    | 3    | 0    | 181    |
|           | Percentage | 89,0% | 9,4%  | 1,7% | 0,0% | 100,0% |
| BACHE     | Positive   | 120   | 7     | 1    | 0    | 128    |
|           | Percentage | 93,8% | 5,5%  | 0,8% | 0,0% | 100,0% |
| EKONEMAN  | Positive   | 23    | 1     | 0    | 0    | 24     |
|           | Percentage | 95,8% | 4,2%  | 0,0% | 0,0% | 100,0% |
| KESHAM    | Positive   | 159   | 12    | 3    | 0    | 174    |
|           | Percentage | 91,4% | 6,9%  | 1,7% | 0,0% | 100,0% |
| MBOFONG   | Positive   | 36    | 2     | 1    | 0    | 39     |
|           | Percentage | 92,3% | 5,1%  | 2,6% | 0,0% | 100,0% |
| NKOGHO    | Positive   | 89    | 15    | 3    | 2    | 107    |
|           | Percentage | 83,2% | 14,0% | 2,8% | 1,9% | 100,0% |
| OBONYI 1  | Positive   | 114   | 6     | 1    | 0    | 121    |
|           | Percentage | 94,2% | 5,0%  | 0,8% | 0,0% | 100,0% |
| OBONYI 3  | Positive   | 149   | 9     | 1    | 0    | 159    |
|           | Percentage | 93,7% | 5,7%  | 0,6% | 0,0% | 100,0% |
| OGURANG   | Positive   | 75    | 4     | 0    | 0    | 79     |
|           | Percentage | 94,9% | 5,1%  | 0,0% | 0,0% | 100,0% |
| OKPAMBE   | Positive   | 44    | 1     | 0    | 0    | 45     |
|           | Percentage | 97,8% | 2,2%  | 0,0% | 0,0% | 100,0% |
| TAKAMANDA | Positive   | 123   | 11    | 0    | 0    | 134    |
|           | Percentage | 91,8% | 8,2%  | 0,0% | 0,0% | 100,0% |
| Total     | Positive   | 1340  | 103   | 15   | 3    | 1458   |
|           | Percentage | 91,9% | 7,1%  | 1,0% | 0,2% | 100    |
