# Supplementary material for: Impact of repeated annual community directed treatment with ivermectin on loiasis parasitological indicators in Cameroon: Implications for onchocerciasis and lymphatic filariasis elimination in areas co-endemic with Loa loa in Africa
Source: PubMed Central journal article supplement (PMC6161907; doi:10.1371/journal.pntd.0006750), 2018-09-18
Supplement: pntd.0006750.s003.pdf [file pntd.0006750.s003.pdf]

| Project_Region         |            |               | Microfilaria loads |             |                 |             | Total  |        |
|------------------------|------------|---------------|--------------------|-------------|-----------------|-------------|--------|--------|
|                        |            |               | 0 mf/ml            | 1-8000mf/ml | 8001-30000mf/ml | >30000mf/ml |        |        |
| EAST<br>(8 years CDTI) | Community  | AVIATION      | Positive           | 67          | 7               | 1           | 1      | 76     |
|                        |            | Percentage    | 88,2%              | 9,2%        | 1,3%            | 1,3%        | 100,0% |        |
|                        |            | BISSOUA 2     | Positive           | 89          | 21              | 4           | 0      | 114    |
|                        |            |               | Percentage         | 78,1%       | 18,4%           | 3,5%        | 0,0%   | 100,0% |
|                        |            | BOMBI         | Positive           | 78          | 12              | 1           | 1      | 92     |
|                        |            |               | Percentage         | 84,8%       | 13,0%           | 1,1%        | 1,1%   | 100,0% |
|                        |            | DENG-DENG     | Positive           | 66          | 9               | 1           | 0      | 76     |
|                        |            |               | Percentage         | 86,8%       | 11,8%           | 1,3%        | 0,0%   | 100,0% |
|                        |            | DOUME VILLAGE | Positive           | 29          | 1               | 0           | 0      | 30     |
|                        |            |               | Percentage         | 96,7%       | 3,3%            | 0,0%        | 0,0%   | 100,0% |
|                        |            | KANDA         | Positive           | 79          | 15              | 1           | 2      | 97     |
|                        |            |               | Percentage         | 81,4%       | 15,5%           | 1,0%        | 2,1%   | 100,0% |
|                        |            | KOUM          | Positive           | 37          | 4               | 0           | 0      | 41     |
|                        |            |               | Percentage         | 90,2%       | 9,8%            | 0,0%        | 0,0%   | 100,0% |
|                        |            | LABBA         | Positive           | 31          | 2               | 0           | 0      | 33     |
|                        |            |               | Percentage         | 93,9%       | 6,1%            | 0,0%        | 0,0%   | 100,0% |
|                        |            | MAYOS         | Positive           | 55          | 6               | 0           | 0      | 61     |
|                        |            |               | Percentage         | 90,2%       | 9,8%            | 0,0%        | 0,0%   | 100,0% |
|                        |            | MBETHEN 2     | Positive           | 72          | 17              | 1           | 1      | 91     |
|                        |            |               | Percentage         | 79,1%       | 18,7%           | 1,1%        | 1,1%   | 100,0% |
| MEBA                   | Positive   | 33            | 12                 | 0           | 0               | 45          |        |        |
|                        | Percentage | 73,3%         | 26,7%              | 0,0%        | 0,0%            | 100,0%      |        |        |
|                        |            | Positive      | 60                 | 9           | 0               | 0           | 69     |        |

|                              |                   |            |       |       |      |      |        |
|------------------------------|-------------------|------------|-------|-------|------|------|--------|
|                              | MESSAMENA VILLAGE | Percentage | 87,0% | 13,0% | 0,0% | 0,0% | 100,0% |
|                              | NDEMBA 1          | Positive   | 78    | 12    | 0    | 2    | 92     |
|                              |                   | Percentage | 84,8% | 13,0% | 0,0% | 2,2% | 100,0% |
|                              | NKOMZUH           | Positive   | 32    | 11    | 0    | 0    | 43     |
|                              |                   | Percentage | 74,4% | 25,6% | 0,0% | 0,0% | 100,0% |
|                              | NTOLLOCK          | Positive   | 36    | 11    | 0    | 0    | 47     |
|                              |                   | Percentage | 76,6% | 23,4% | 0,0% | 0,0% | 100,0% |
|                              | SOLEYE            | Positive   | 107   | 11    | 5    | 0    | 123    |
|                              |                   | Percentage | 87,0% | 8,9%  | 4,1% | 0,0% | 100,0% |
| Total                        |                   | Positive   | 949   | 160   | 14   | 7    | 1130   |
|                              |                   | Percentage | 84,0% | 14,2% | 1,2% | 0,6% | 100,0% |
| NORTH-WEST<br>(9 years CDTI) | JATOR             | Positive   | 81    | 10    | 2    | 0    | 93     |
|                              |                   | Percentage | 87,1% | 10,8% | 2,2% | 0,0% | 100,0% |
|                              | MBIRIPKWA         | Positive   | 81    | 25    | 0    | 3    | 109    |
|                              |                   | Percentage | 74,3% | 22,9% | 0,0% | 2,8% | 100,0% |
|                              | NGOMKOW           | Positive   | 137   | 3     | 1    | 0    | 141    |
|                              |                   | Percentage | 97,2% | 2,1%  | 0,7% | 0,0% | 100,0% |
|                              | NGU               | Positive   | 88    | 18    | 3    | 0    | 109    |
|                              |                   | Percentage | 80,7% | 16,5% | 2,8% | 0,0% | 100,0% |
|                              | NGURI             | Positive   | 84    | 23    | 4    | 1    | 112    |
|                              |                   | Percentage | 75,0% | 20,5% | 3,6% | 0,9% | 100,0% |
|                              | NKING             | Positive   | 56    | 20    | 7    | 3    | 86     |
|                              |                   | Percentage | 65,1% | 23,3% | 8,1% | 3,5% | 100,0% |
|                              | NTEM              | Positive   | 107   | 22    | 3    | 0    | 132    |
|                              |                   | Percentage | 81,1% | 16,7% | 2,3% | 0,0% | 100,0% |
|                              | NWANTI            | Positive   | 93    | 24    | 2    | 1    | 120    |
|                              |                   | Percentage | 77,5% | 20,0% | 1,7% | 0,8% | 100,0% |

|                                 |           |            |            |       |       |      |        |        |
|---------------------------------|-----------|------------|------------|-------|-------|------|--------|--------|
|                                 | NWAT      | Positive   | 88         | 8     | 2     | 1    | 99     |        |
|                                 |           | Percentage | 88,9%      | 8,1%  | 2,0%  | 1,0% | 100,0% |        |
|                                 | SABONGARI | Positive   | 79         | 8     | 1     | 0    | 88     |        |
|                                 |           | Percentage | 89,8%      | 9,1%  | 1,1%  | 0,0% | 100,0% |        |
|                                 | Total     | Positive   | 894        | 161   | 25    | 9    | 1089   |        |
|                                 |           | Percentage | 82,1%      | 14,8% | 2,3%  | 0,8% | 100,0% |        |
| SOUTH-WEST 2<br>(14 years CDTI) | Community | ASSAM      | Positive   | 41    | 2     | 0    | 0      | 43     |
|                                 |           |            | Percentage | 95,3% | 4,7%  | 0,0% | 0,0%   | 100,0% |
|                                 |           | AYUKABA    | Positive   | 91    | 5     | 0    | 0      | 96     |
|                                 |           |            | Percentage | 94,8% | 5,2%  | 0,0% | 0,0%   | 100,0% |
|                                 |           | BACHE      | Positive   | 71    | 6     | 0    | 0      | 77     |
|                                 |           |            | Percentage | 92,2% | 7,8%  | 0,0% | 0,0%   | 100,0% |
|                                 |           | EBAM       | Positive   | 70    | 4     | 0    | 0      | 74     |
|                                 |           |            | Percentage | 94,6% | 5,4%  | 0,0% | 0,0%   | 100,0% |
|                                 |           | EYANCHANG  | Positive   | 87    | 2     | 0    | 0      | 89     |
|                                 |           |            | Percentage | 97,8% | 2,2%  | 0,0% | 0,0%   | 100,0% |
|                                 |           | KESHAM     | Positive   | 89    | 5     | 1    | 0      | 95     |
|                                 |           |            | Percentage | 93,7% | 5,3%  | 1,1% | 0,0%   | 100,0% |
|                                 |           | MBAKEM     | Positive   | 37    | 1     | 0    | 0      | 38     |
|                                 |           |            | Percentage | 97,4% | 2,6%  | 0,0% | 0,0%   | 100,0% |
|                                 |           | MBATOP     | Positive   | 79    | 8     | 2    | 1      | 90     |
|                                 |           |            | Percentage | 87,8% | 8,9%  | 2,2% | 1,1%   | 100,0% |
|                                 |           | OKPAMBE    | Positive   | 56    | 11    | 2    | 0      | 69     |
|                                 |           |            | Percentage | 81,2% | 15,9% | 2,9% | 0,0%   | 100,0% |
|                                 |           | TABOH      | Positive   | 55    | 7     | 0    | 0      | 62     |
|                                 |           |            | Percentage | 88,7% | 11,3% | 0,0% | 0,0%   | 100,0% |
|                                 | Total     | Positive   | 676        | 51    | 5     | 1    | 733    |        |
|                                 |           | Percentage | 92,2%      | 7,0%  | 0,7%  | 0,1% | 100,0% |        |
