# Supplementary material for: Impact of repeated annual community directed treatment with ivermectin on loiasis parasitological indicators in Cameroon: Implications for onchocerciasis and lymphatic filariasis elimination in areas co-endemic with Loa loa in Africa
Source: PubMed Central journal article supplement (PMC6161907; doi:10.1371/journal.pntd.0006750), 2018-09-18
Supplement: pntd.0006750.s004.pdf [file pntd.0006750.s004.pdf]

| Site      | Time of Screening        | Non neurological Risk (%) | No risk | Total screened | Risk Difference (%) | % Potential Risk avoided amongst CDTI adherents** | Relative Risk | % Potential Prevented cases in the population*** |
|-----------|--------------------------|---------------------------|---------|----------------|---------------------|---------------------------------------------------|---------------|--------------------------------------------------|
|           | Baseline Non CDTI        | 46 (5,1)                  | 854     | 900            |                     |                                                   |               |                                                  |
| East      | Follow up (8 years CDTI) | 14 (1,2)                  | 1121    | 1135           | 32 (3,9)            | 76                                                | 0,24          | 64                                               |
| Northwest | Before CDTI              | 45 (4,4)                  | 983     | 1028           | 20 (2,5)            | 57                                                | 0,43          | 39                                               |
|           | Follow up                | 25 (1,9)                  | 1299    | 1324           |                     |                                                   |               |                                                  |
| Southwest | Before CDTI              | 12 (0,8)                  | 1446    | 1458           | 7 (0,3)             | 38                                                | 0,62          | 30                                               |
|           | Follow up                | 5 (0,5)                   | 924     | 929            |                     |                                                   |               |                                                  |

\*These are individuals with *L. loa* mf loads between 8000mf/ml – 30000 mf/ml

\*\* Calculated as  $(1-RR)*100$ , where RR = relative risk

\*\*\* Calculated as  $P*(1-RR)*100$ , where P = IVM compliance, RR = relative risk
