# Supplementary material for: Impact of repeated annual community directed treatment with ivermectin on loiasis parasitological indicators in Cameroon: Implications for onchocerciasis and lymphatic filariasis elimination in areas co-endemic with Loa loa in Africa
Source: PubMed Central journal article supplement (PMC6161907; doi:10.1371/journal.pntd.0006750), 2018-09-18
Supplement: pntd.0006750.s005.pdf [file pntd.0006750.s005.pdf]

| Site      | Time of Screening   | Risk<br>>30000mf/ml<br>(%) | No Risk | Total screened | Risk<br>Difference | % Risk avoided<br>amongst CDTI<br>adherents** | Relative<br>Risk | % Prevented Risk<br>in the<br>population*** |
|-----------|---------------------|----------------------------|---------|----------------|--------------------|-----------------------------------------------|------------------|---------------------------------------------|
| East      | Non CDTI (baseline) | 8 (0.9)                    | 892     | 900            | 1 (0.3)            | 0.33                                          | 70               | 0.26                                        |
|           | Follow up           | 7 (0.6)                    | 1128    | 1135           |                    |                                               |                  |                                             |
| Northwest | Before CDTI         | 34 (1.0)                   | 3038    | 3072           | 25 (0.3)           | 0.3                                           | 70               | 0.20                                        |
|           | Follow up           | 9 (0.7)                    | 1315    | 1324           |                    |                                               |                  |                                             |
| Southwest | Before CDTI         | 3 (0.2)                    | 1455    | 1458           | 2 (0.1)            | 0.5                                           | 50               | 0.39                                        |
|           | Follow up           | 1 (0.1)                    | 928     | 929            |                    |                                               |                  |                                             |

\*These are individuals with *L. loa* mf loads greater than 30000 mf/ml

\*\* Calculated as  $(1-RR)*100$ , where RR = relative risk

\*\*\* Calculated as  $P*(1-RR)*100$ , where P = IVM compliance, RR = relative risk
